# Supplementary material for: Pectin coated polyaniline nanoparticles for an amperometric glucose biosensor
Source: Royal Society of Chemistry journal article supplement (doi:10.1039/c4ra05264a), 2014-01-01
Supplement: c4ra05264a1.pdf [file c4ra05264a1.pdf]

## Supplementary Information

### Pectin coated polyaniline nanoparticles for amperometric glucose biosensor

Bhawana Thakur, Chellachamy A. Amarnath and Shilpa N. Sawant\*

Chemistry Division, Bhabha Atomic Research Centre, Trombay, Mumbai 400085, India.

Correspondence: Telephone: +22 25590288, Email: stawde@barc.gov.in (Dr. Shilpa N. Sawant)

#### INDEX LIST

##### 1. Experimental section

A. FITC tagging procedure

B. Colorimetric assay for estimation of the amount of GOx loaded on PANi- Pec NPs

C. Biocompatibility studies

##### 2. Results & Discussion

A. Advantages and drawbacks of various methods used for synthesis of PANi nanostructures.

B. Figures and Tables

Figure S1: FT-IR spectra of (a) PANi- Pec NPs (b) GOx- PANi- Pec NPs

Figure S2: Hydrodynamic radius distribution plot of PANi- Pec and GOx-PANi- Pec NPs.

Figure S3: CV of a) PANi- Pec NPs and b) GOx- PANi- Pec NPs in 1 M HCl

at a scan rate of 50 mVs<sup>-1</sup>.

**Figure S4: Cyclic voltammogram of PANi modified electrode with increasing H<sub>2</sub>O<sub>2</sub> concentration.**

Figure S5: Cyclic voltammogram of GOx- PANi- Pec NPs in 2mM glucose (PBS) at

different scan rates. Inset: Plot of current at 0.6 V vs. scan rate.

Figure S6: Amperometric response of the biosensor electrode towards glucose at various working potentials.

Figure S7: Lineweaver-Burk plot for amperometric response of GOx- PANi- Pec NP biosensor towards glucose addition.

Table S1: Overview of sensor characteristics for the various glucose sensors reported in literature.

Table S2: Reproducibility & repeatability of the biosensor.

Table S3: Determination of glucose in blood serum samples using the GOx- PANi- Pec NPs biosensor.

## **1. Experimental section**

### **A) FITC tagging procedure.**

0.25 mg FITC was added to 10 mg each of PANi- Pec and GOx- PANi- Pec NPs dispersed in PBS (pH 7.4) in two different vials. The vials were kept on a shaker for 1 h at RT. The particles were centrifuged, washed twice with PBS and finally re- dispersed in 1ml PBS. 10  $\mu$ l of dispersed particles were casted uniformly on a clean glass slide for recording the fluorescence microscope images.

### **B) Colorimetric assay for estimation of the amount of GOx loaded on PANi- Pec NPs.**

The amount of GOx loaded on PANi-Pec NPs was determined by colorimetric enzyme assay<sup>1</sup>. GOx -PANi- Pec NPs were incubated with 1mM glucose in PBS solution (pH 7.4) for ten min at room temperature and then a mixture of HRP (0.001 wt %), 4-Aminoantipyrine (0.006 wt %) and of N,N- diethyl aniline (0.0045 wt %) were added to the above solution. The H<sub>2</sub>O<sub>2</sub> released on catalytic oxidation of glucose by GOx, leads to oxidative coupling of N, N- diethylaniline with 4-amino-antipyrine resulting in the formation of a purple dye which absorbs at 553 nm. A standard curve [Absorbance at 553 nm for a constant value of glucose (1 mM) versus different GOx concentration] was plotted and used to determine the amount of GOx loaded on PANi- Pec NPs.

### **C) Biocompatibility studies**

Polyurethane (PU) films were used as substrate to coat PANi- Pec NPs. PU was soaked in aqueous solution contains PEC, aniline, HCl for 24 h and later initiator ammonium persulfate was added in the mixture to initiate the formation of PANi-PEC on the PU films.

Homogeneous green color on the PU film indicated the formation of PANi-PEC on the PU films (PU-PAni-PEC) and used for the biocompatibility studies.

The biocompatibility of polymer films was assessed with L6 rat myoblast cells. L6 cells were cultured in DMEM medium supplemented with 10 % FBS and 1 % antimycotic-antibiotic solution in an incubator humidified with 5 % CO<sub>2</sub> at 37 °C. Polymers films were sterilized with 70 % ethanol and equilibrated with phosphate buffered saline (PBS) for 1 h. Approximately 10<sup>4</sup> L6 cells were counted and added to the polymer films and incubated for 24 h. The cell viability was determined by MTT assay<sup>2</sup> and the percentage cell viability was determined by using the formula,

% cell viability = [Absorbance of cells cultured with polymer/ absorbance of cell cultured alone] x100

## 2. Figures and Table

Figure S1: FT-IR spectra of (a) PAni- Pec NPs (b) GOx- PAni- Pec NPs

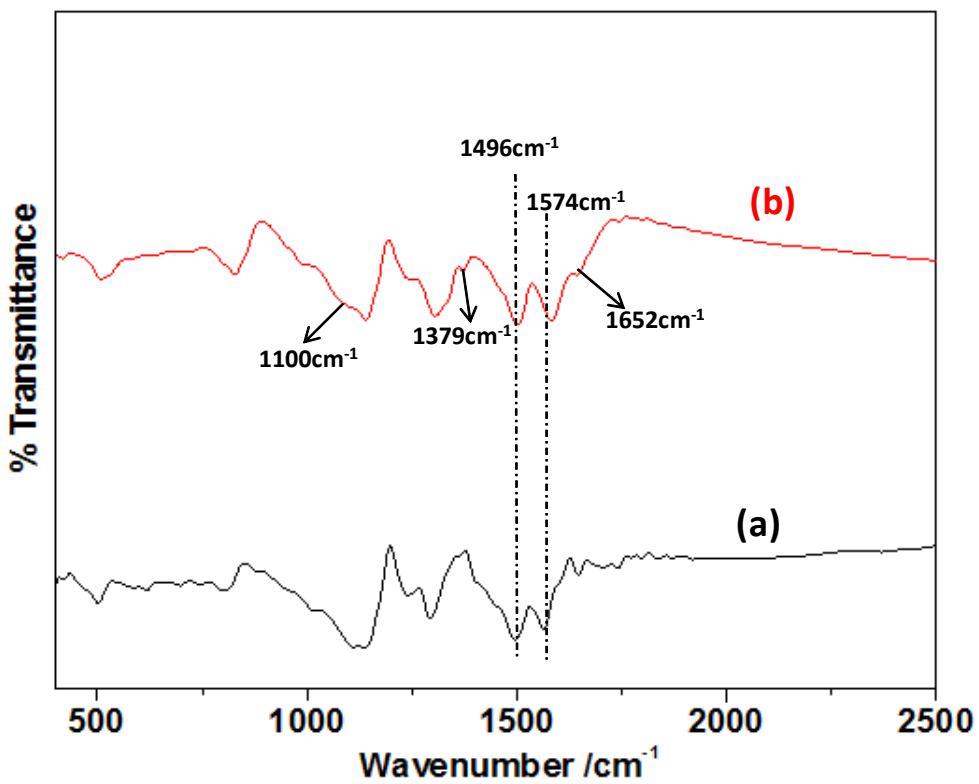

Figure S2: Hydrodynamic radius distribution plot of PANi- Pec and GOx-PANi- Pec NPs.

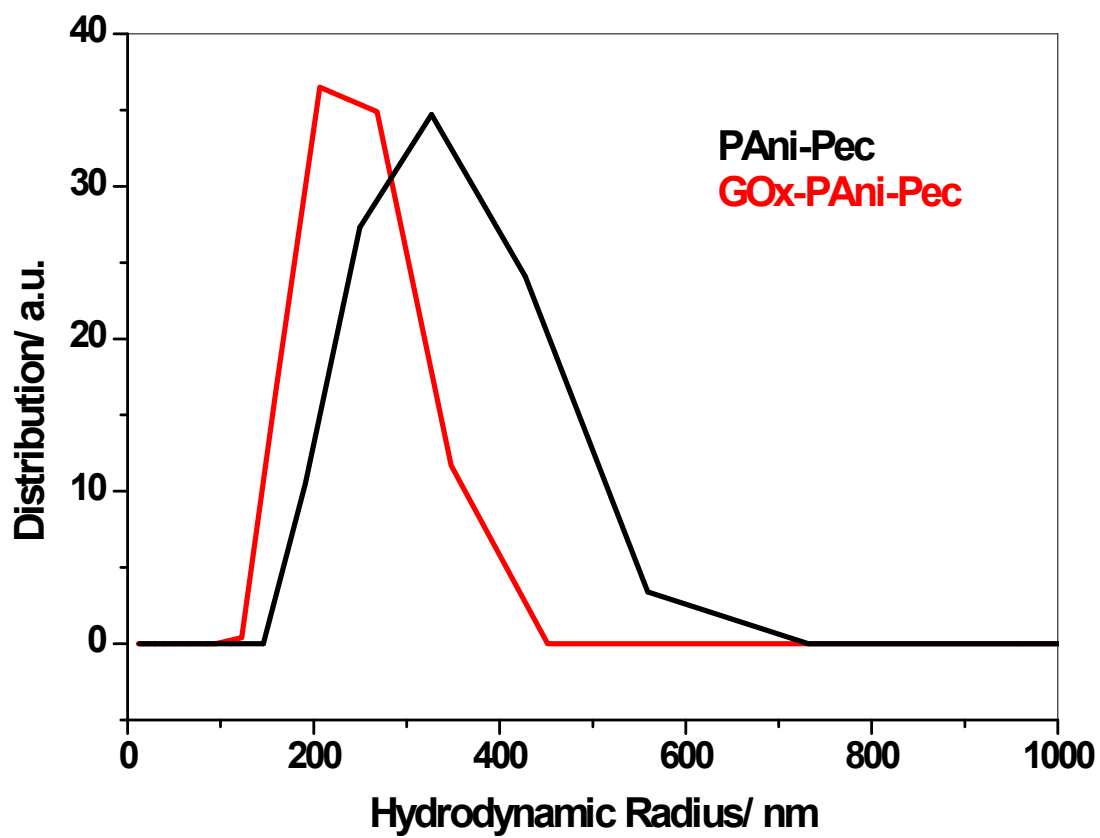

**Figure S3: CV of a) PAni- Pec NPs and b) GOx- PAni- Pec NPs in 1 M HCl at a scan rate of 50 mVs<sup>-1</sup>.**

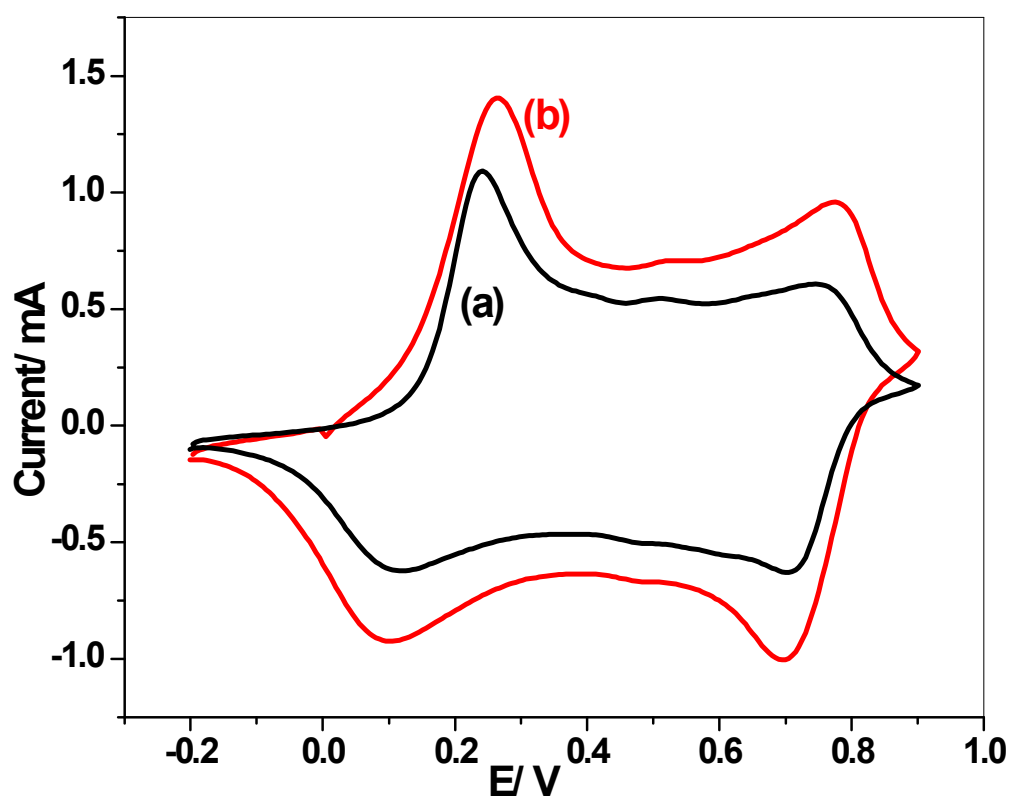

**Figure S4: Cyclic voltammogram of PANi modified electrode with increasing H<sub>2</sub>O<sub>2</sub> concentration.**

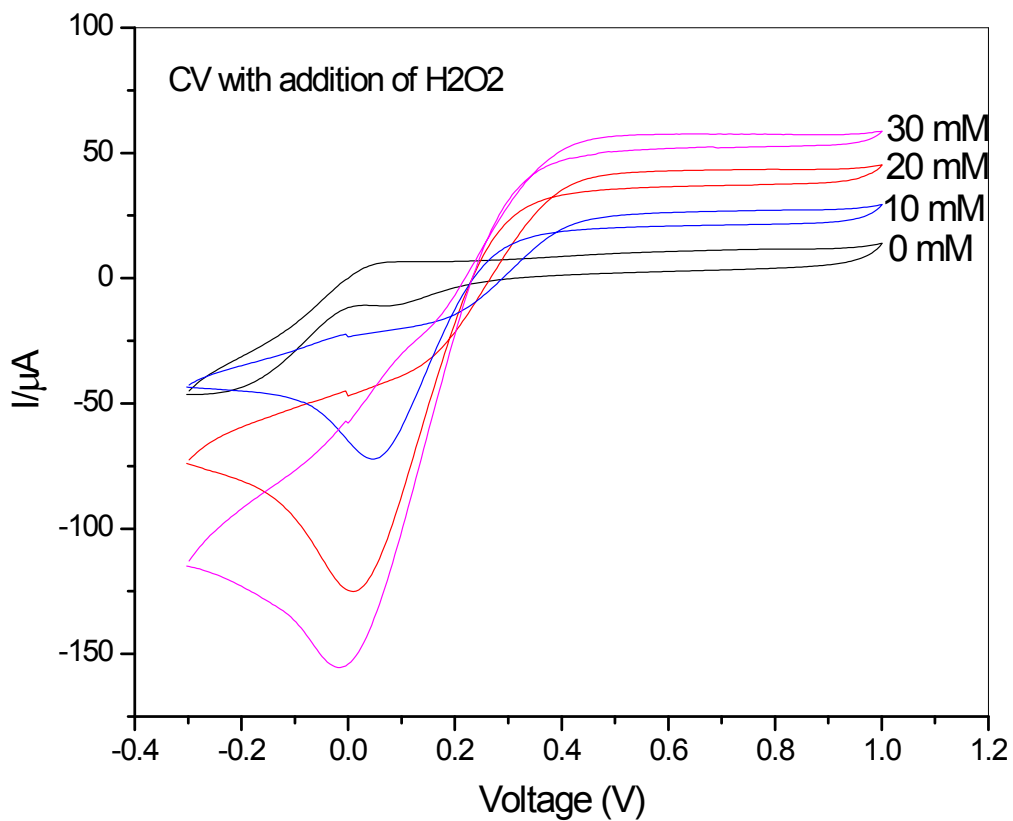

Figure S5: Cyclic voltammogram of GOx- PANi- Pec NPs in 2mM glucose (PBS) at different scan rates. Inset: Plot of current at 0.6 V vs. scan rate.

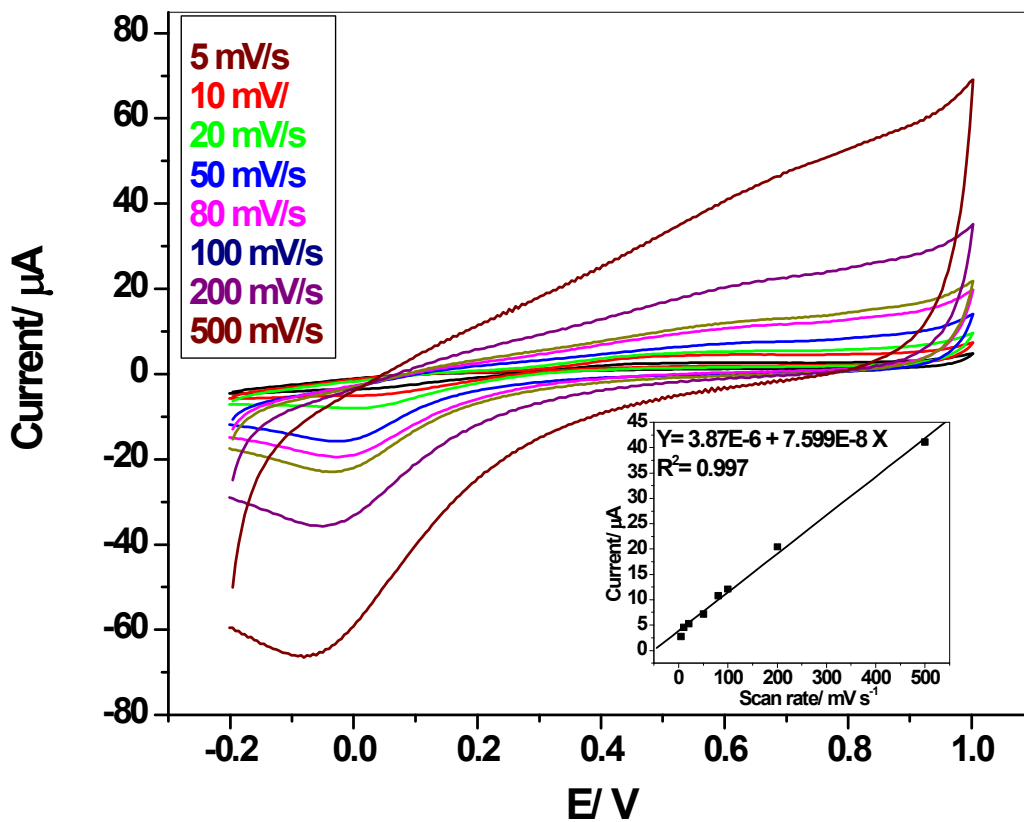



Figure S6: Amperometric response of the biosensor electrode towards glucose at various working potentials. Inset: The corresponding amperograms on application of pulse of different voltages.

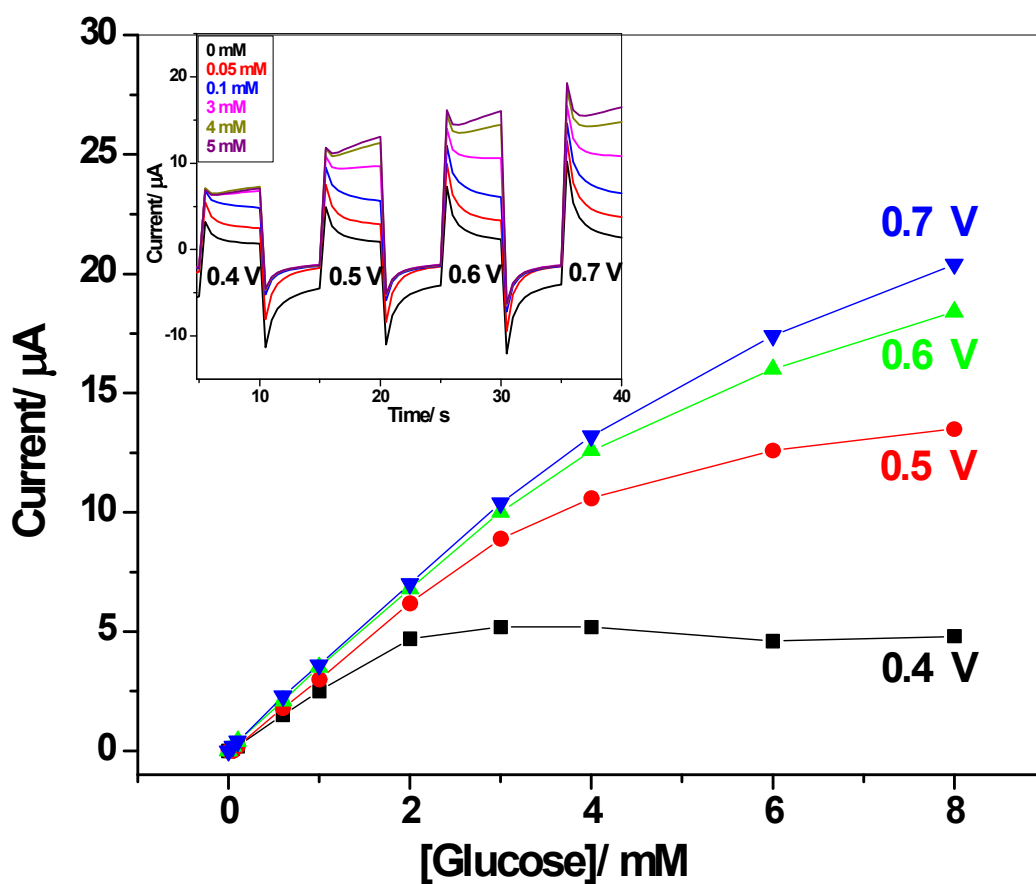

Figure S7: Lineweaver-Burk plot for amperometric response of GOx- PANi- Pec NPs biosensor towards glucose addition.

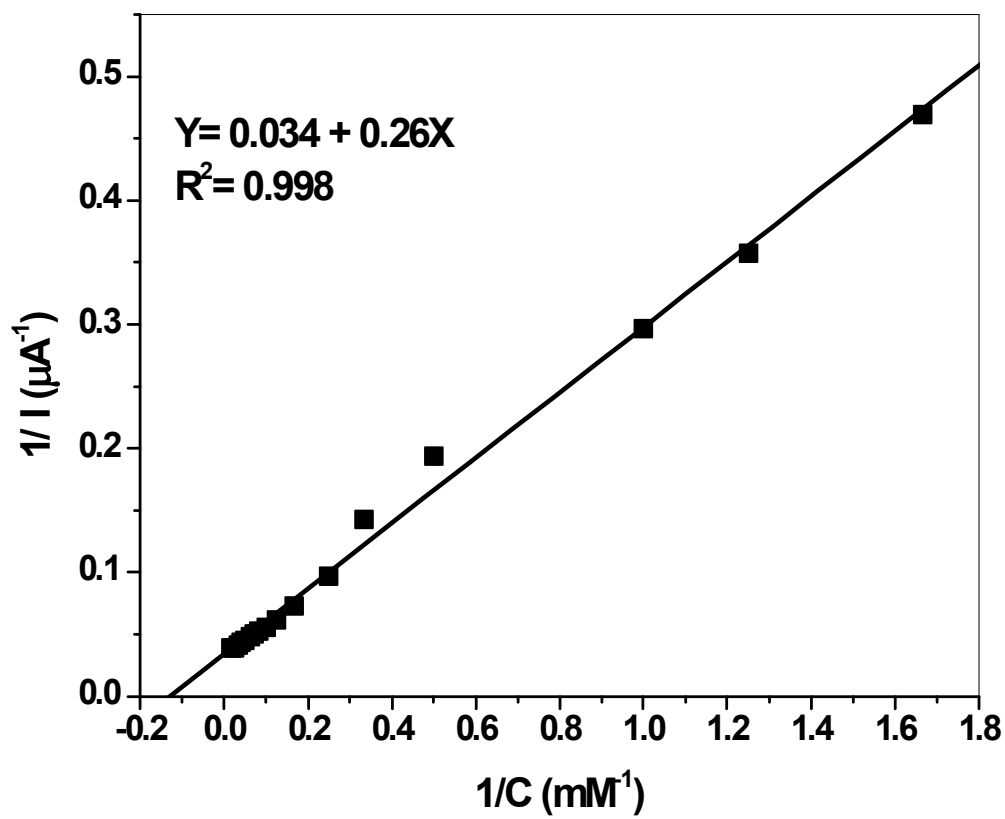

## 2A: Advantages and drawbacks of various methods used for synthesis of PANi nanostructures

| No. | Polymerization Method                              | Advantages                                                                                                                              | Drawbacks                                                                                        | Reference    |
|-----|----------------------------------------------------|-----------------------------------------------------------------------------------------------------------------------------------------|--------------------------------------------------------------------------------------------------|--------------|
| 1   | Template and seeded growth                         | Controlled morphology                                                                                                                   | Need to remove the template                                                                      | 3            |
| 2   | Electrospinning/<br>Electrochemical polymerization | Affords uniform fibres, gives good adherence to the substrate                                                                           | Requires conducting substrate                                                                    | 3            |
| 3   | Surfactant assisted polymerizations                | Controlled morphology                                                                                                                   | Difficulty in removing surfactants from resulting nanostructure during post-synthetic treatments | 3            |
| 4   | Interfacial polymerizations                        | Nanofibered morphology                                                                                                                  | Involves the use of organic solvent during synthesis and low yield                               | 4            |
| 5   | Sonochemical synthesis                             | Smooth surface with uniform morphology                                                                                                  | Requires additional equipment                                                                    | 5            |
| 6   | Solution polymerization                            | Tuneable morphology                                                                                                                     | Intractable product                                                                              | 5            |
| 7   | Enzymatic synthesis                                | Eco-friendly                                                                                                                            | Expensive                                                                                        | 5            |
| 8   | Our method<br>(GOx-PANi-Pec NPs)                   | Controlled morphology, no organic solvent used, highly biocompatible environment for the entrapped biomolecule due to biopolymer pectin | -                                                                                                | Present work |

**Table S1: Overview of sensor characteristics for the various glucose sensors reported in literature.**

**The characteristics nano-structured polyaniline based glucose sensors are highlighted in grey.**

| <b>Electrode Material</b>                     | <b>Linear Range</b> | <b>Sensitivity</b>                         | <b>Detection Limit</b> | <b>Km</b> | <b>Interference effects</b>                                                                                  | <b>Ref.</b> |
|-----------------------------------------------|---------------------|--------------------------------------------|------------------------|-----------|--------------------------------------------------------------------------------------------------------------|-------------|
| Pt/GOx-PVA                                    | 0.3-2.0 mM          | 9.66 $\mu\text{A mM}^{-1}$                 | 10 $\mu\text{M}$       | 12.8 mM   | No interference due to Fructose, sorbitol and UA. A minimal interference from AA observed.                   | 6           |
| PB/MWNTs-GOx-CS-ICPTES sol-gel composite film | 0.025-1.3 mM        | 15.2 $\mu\text{A mM}^{-1} \text{cm}^{-2}$  | 7.5 $\mu\text{M}$      | 3.67 mM   | No interference due to AA and UA.                                                                            | 7           |
| GOD/Pt/MWNT-PAni biosensor                    | 0.003-8.2 mM        | 16.1 $\mu\text{A mM}^{-1}$                 | 1 $\mu\text{M}$        | 0.64 mM   | No interference due to UA, Ethanol, L-cysteine, AA and L-tyrosine.                                           | 8           |
| PAni/PAN-GOD                                  | 0.002-12mM          | 34.11 $\mu\text{A mM}^{-1} \text{cm}^{-2}$ | 2 $\mu\text{M}$        | 13.0 mM   | No interference due to AA, glutathione and acetaminophen. A negligible interference effect from UA observed. | 9           |
| GOx/Pt-DENs/PAni/CNT                          | 0.001-12 mM         | 42.0 $\mu\text{A mM}^{-1} \text{cm}^{-2}$  | 0.5 $\mu\text{M}$      | -         | No interference due to UA, AA and acetaminophen.                                                             | 10          |
| The GOD/CS-PB/CS                              | 0.002-0.4 mM        | -                                          | 0.397 $\mu\text{M}$    | 3.73 mM   | No interference due to UA and AA.                                                                            | 11          |
| Pt-DENs/GOx/Pt-DENs/PAni/PSS                  | 0.01-4.5 mM         | 39.63 $\mu\text{A mM}^{-1} \text{cm}^{-2}$ | 0.5 $\mu\text{M}$      | -         | No interference due to UA, acetaminophen and AA.                                                             | 12          |
| PtNPs- PAni hydrogel                          | 0.01-8 mM           | 96.1 $\mu\text{A mM}^{-1} \text{cm}^{-2}$  | 0.7 $\mu\text{M}$      | 0.572 mM  | No interference due to AA and glutathione. A negligible interference effect from L-cysteine observed.        | 13          |

|                            |             |                                                                             |                 |                  |                                                             |             |
|----------------------------|-------------|-----------------------------------------------------------------------------|-----------------|------------------|-------------------------------------------------------------|-------------|
| PAAni- nanowires           | 0-8 mM      | 2.5 mA mM <sup>-1</sup><br>cm <sup>-2</sup>                                 | 0.05 mM         | -                | -                                                           | 14          |
| PAAni- nanotube            | 0.01-5.5 mM | 97.18 ±4.62 μA<br>mM <sup>-1</sup> cm <sup>-2</sup>                         | 0.3 ± 0.1<br>μM | 2.37 ± 0.5<br>mM | No interference due to<br>AA, UA and 4-<br>acetamidophenol. | 15          |
| PAAni- nanofibre           | 0.01 -1 mM  | 0.5μA/mM                                                                    | 0.5 μM          | 1.05± 0.04<br>mM | No interference due to<br>AA, UA and 4-<br>acetamidophenol. | 16          |
| GOx- PAAni-Pec<br>NPs      | 0.06- 4 mM  | 79.49 μA<br>mM <sup>-1</sup> cm <sup>-2</sup><br>(2.5 μA mM <sup>-1</sup> ) | 43.5μM          | 7.65 mM          | No interference due to<br>AA, UA and urea.                  | Our<br>Work |
| GOx loaded<br>Normal PAAni | 0.8 - 4 mM  | 22.95 μA<br>mM <sup>-1</sup> cm <sup>-2</sup>                               | 780 μM          | 62.85 mM         | -                                                           | Our<br>Work |

\* Pt= Platinum, GOx- Glucose oxidase, PVA= Poly (vinyl alcohol), MWNTs= Multiwalled carbon nanotube, PB= Prussian blue, CS= Chitosan, ICP TES= 3- isocyanatopropyltriethoxysilane, PAN= Polyacrylonitrile, DENs= Dendrimers, CNT= Carbon nanotubes, PSS= Polystyrene sulphonic acid, PtNPs= Platinum nanoparticles, UA=Uric acid, AA= Ascorbic acid.

**Table S2: Reproducibility & repeatability of the biosensor**

Reproducibility studies: The current response of three different freshly prepared GOx- PAni- Pec NPs biosensor towards addition of 0.4 mM glucose concentration is presented below.

| Electrode No.                  | 1      | 2     | 3     |
|--------------------------------|--------|-------|-------|
| Current                        | 1.163  | 1.248 | 1.254 |
| Mean current ( $\mu\text{A}$ ) | 1.222  |       |       |
| STDev                          | 0.050  |       |       |
| RSD (%)                        | 4.16 % |       |       |

Repeatability studies: The current response of GOx- PAni- Pec NPs biosensor towards addition glucose for three different measurements using the same sensor electrode.

| Glucose (mM) | Measurement1 Current ( $\mu\text{A}$ ) | Measurement2 Current ( $\mu\text{A}$ ) | Measurement3 Current ( $\mu\text{A}$ ) | Average Current ( $\mu\text{A}$ ) | Std.Dev | % RSD  |
|--------------|----------------------------------------|----------------------------------------|----------------------------------------|-----------------------------------|---------|--------|
| 0.4          | 1.437                                  | 1.532                                  | 1.426                                  | 1.464                             | 0.0593  | 4.05 % |

**Table S3: Determination of glucose in blood serum samples using the GOx- PAni- Pec NPs biosensor**

| No. | Values measured using the biosensor (mM) | Values reported by pathology lab (mM) | Bias (mM) | Relative deviation (%) |
|-----|------------------------------------------|---------------------------------------|-----------|------------------------|
| 1   | 3.55                                     | 3.88                                  | -0.23     | -8.5%                  |
| 2   | 4.40                                     | 4.55                                  | -0.30     | -3.29%                 |
| 3   | 4.24                                     | 4.833                                 | -1.55     | -12.2%                 |
| 4   | 6.25                                     | 5.94                                  | 1.20      | 5.20%                  |
| 5   | 6.48                                     | 6.44                                  | 0.38      | 0.6%                   |

## References:

- 1) P. Kabasakalian, S. Kalliney, and A. Westcott, *CLIN. CHEM.*, 1974, 20, 606-607.
- 2) V. Nandakumar, V. Vettriselvi and M. Doble, *RSC Adv.*, 2014, 4, 11438–11443.
- 3) J. Huang and Richard B. Kaner, *J. AM. CHEM. SOC.*, 2004, 126, 851-855.
- 4) S. Bhadra, D. Khastgir, N. K. Singha and J. H. Lee, *Prog. Polym. Sci.*, 2009, 34, 783- 810.
- 5) J. X. Huang, S. Virji, B. H. Weiller and Richard B. Kaner, *J. AM. CHEM. SOC.*, 2003, 125, 314- 315.
- 6) M. R. Guascito, D. Chirizzi, C. Malitesta and E. Mazzota, *Analyst*, 2011, 136, 164
- 7) G. Fu, X. Yue and Z. Dai, *Biosens. Bioelectron.*, 2011, 26,3973–3976.
- 8) H. Zhong, R. Yuan, Y. Chai, W. Li, X. Zhong and Y. Zhang, *Talanta*, 2011, 85, 104–111.
- 9) H. Xue, Z. Shen and C. Li, *Biosens. Bioelectron.*, 2005, 20, 2330–2334.
- 10) Li. Xu, Y. Zhu, X. Yang and C. Li, *Mater. Sci. Eng. C.*, 2009, 1306–1310.
- 11) X. Wang, H. Gu, F. Yin and Y. Tu, *Biosens. Bioelectron.*, 2009, 1527–1530.
- 12) L. Xu, Y. Zhu, L. Tang, X. Yang and C. Li, *Journal of Applied Polymer Science*, Vol. 109, 1802–1807 (2008).
- 13) D. Zhai, B Liu, Y. Shi, L. Pan, Y. Wang, W. Li, R. Zhang and G. Yu, *ACS nano*, 2013, 7, 3540–3546.
- 14) Y. Y. Horng, Y. K. Hsu, A. Ganguly, C. C. Chen, L. C. Chen and K. H. Chen, *Electrochem. Comm.*, 2009, 11, 850–853.
- 15) Z. Wang, S. Liu, P. Wu and C. Cai, *Anal. Chem.*, 2009, 81, 1638–1645.
- 16) M. Zhao, X. Wu, and C. Cai, *J. Phys. Chem. C.*, 2009, 113, 4987–4996.
